# Supplementary material for: Novel anti-cancer drug COTI-2 synergizes with therapeutic agents and does not induce resistance or exhibit cross-resistance in human cancer cell lines
Source: PubMed Central journal article supplement (PMC5783418; doi:10.1371/journal.pone.0191766), 2018-01-24
Supplement: pone.0191766.s005.pdf [file pone.0191766.s005.pdf]

**S1\_Table**

| Day | Vehicle Control | Number of surviving animals alive/number of treated animals (% survival) |                              |                              |                              |                                            |                                            |
|-----|-----------------|--------------------------------------------------------------------------|------------------------------|------------------------------|------------------------------|--------------------------------------------|--------------------------------------------|
|     |                 | COTI-2 alone (30 mg/kg)                                                  | Carboplatin alone (25 mg/kg) | Carboplatin alone (35 mg/kg) | Carboplatin alone (50 mg/kg) | COTI-2 (30 mg/kg) + Carboplatin (25 mg/kg) | COTI-2 (30 mg/kg) + Carboplatin (50 mg/kg) |
| 1   | 6/6 (100%)      | (30 mg/kg)                                                               | 6/6 (100%)                   | 6/6 (100%)                   | 6/6 (100%)                   | 6/6 (100%)                                 | 6/6 (100%)                                 |
| 5   | 6/6 (100%)      | 6/6 (100%)                                                               | 6/6 (100%)                   | 6/6 (100%)                   | 5/6 (83%)                    | 6/6 (100%)                                 | 2/6 (33%)                                  |
| 8   | 6/6 (100%)      | 6/6 (100%)                                                               | 6/6 (100%)                   | 5/6 (83%)                    | 4/6 (67%)                    | 6/6 (100%)                                 | 0/6 (0%)                                   |
| 12  | 6/6 (100%)      | 6/6 (100%)                                                               | 6/6 (100%)                   | 5/6 (83%)                    | 2/6 (33%)                    | 6/6 (100%)                                 | 0/6 (0%)                                   |
| 19  | 6/6 (100%)      | 6/6 (100%)                                                               | 6/6 (100%)                   | 4/6 (67%)                    | 1/6 (17%)                    | 6/6 (100%)                                 | 0/6 (0%)                                   |
| 22  | 6/6 (100%)      | 6/6 (100%)                                                               | 6/6 (100%)                   | 2/6 (33%)                    | 0/6 (0%)                     | 6/6 (100%)                                 | 0/6 (0%)                                   |
| 26  | 6/6 (100%)      | 6/6 (100%)                                                               | 6/6 (100%)                   | 2/6 (33%)                    | 0/6 (0%)                     | 6/6 (100%)                                 | 0/6 (0%)                                   |
| 29  | 6/6 (100%)      | 6/6 (100%)                                                               | 6/6 (100%)                   | 2/6 (33%)                    | 0/6 (0%)                     | 6/6 (100%)                                 | 0/6 (0%)                                   |
| 33  | 6/6 (100%)      | 6/6 (100%)                                                               | 6/6 (100%)                   | 2/6 (33%)                    | 0/6 (0%)                     | 6/6 (100%)                                 | 0/6 (0%)                                   |
| 36  | 6/6 (100%)      | 6/6 (100%)                                                               | 6/6 (100%)                   | 2/6 (33%)                    | 0/6 (0%)                     | 6/6 (100%)                                 | 0/6 (0%)                                   |
| 40  | 6/6 (100%)      | 6/6 (100%)                                                               | 6/6 (100%)                   | 2/6 (33%)                    | 0/6 (0%)                     | 6/6 (100%)                                 | 0/6 (0%)                                   |
| 43  | 6/6 (100%)      | 6/6 (100%)                                                               | 6/6 (100%)                   | 2/6 (33%)                    | 0/6 (0%)                     | 6/6 (100%)                                 | 0/6 (0%)                                   |
| 47  | 6/6 (100%)      | 6/6 (100%)                                                               | 6/6 (100%)                   | 2/6 (33%)                    | 0/6 (0%)                     | 6/6 (100%)                                 | 0/6 (0%)                                   |
| 50  | 6/6 (100%)      | 6/6 (100%)                                                               | 6/6 (100%)                   | 2/6 (33%)                    | 0/6 (0%)                     | 6/6 (100%)                                 | 0/6 (0%)                                   |
